# Supplementary material for: Seasonal dynamics of the COS and CO 2 exchange of a managed temperate grassland
Source: Copernicus journal article supplement (doi:10.5194/bg-2020-27), 2020-02-11
Supplement: Supplementary file 1 [file bg-2020-27-supplement.pdf]

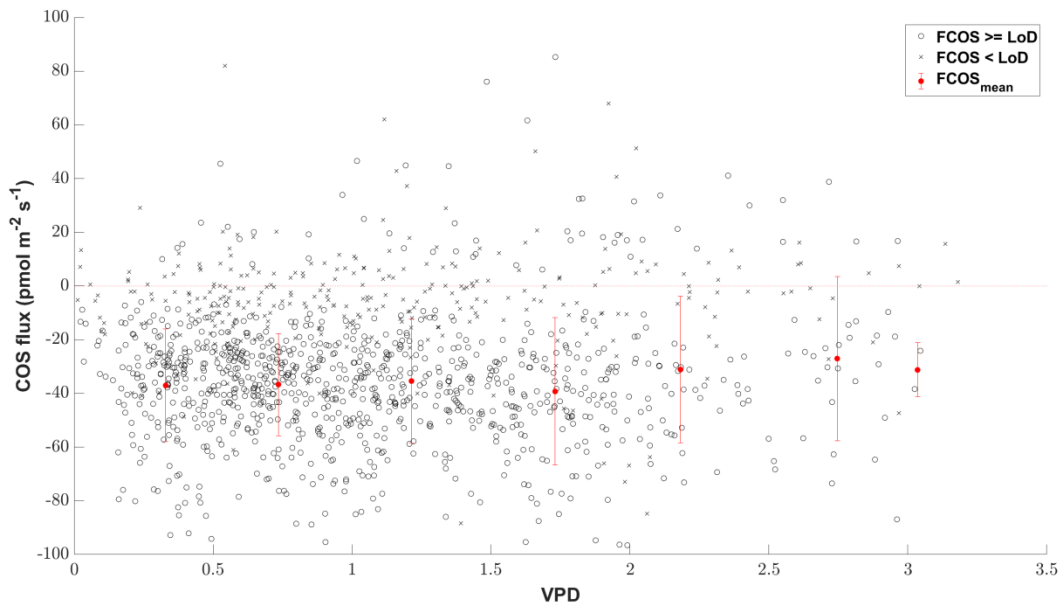

**Figure S1** Influence of vapor pressure deficit (VPD) on COS ecosystem flux ( $\text{pmol m}^{-2} \text{s}^{-1}$ ) at times of high incoming photosynthetic active radiation ( $\text{PAR}_{\text{inc}} \geq 800$ )

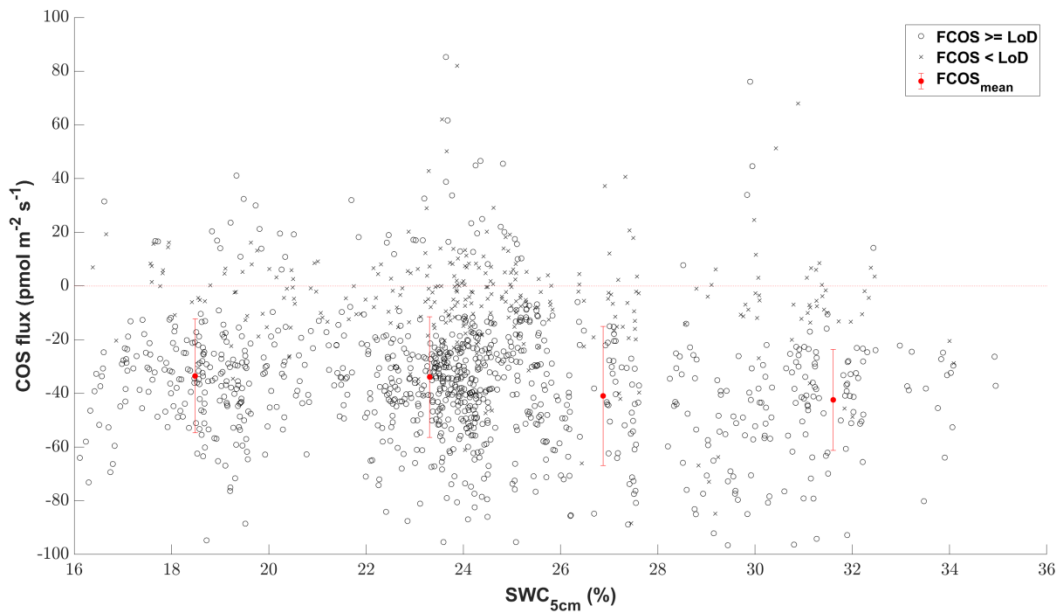

**Figure S2** Influence of the soil water content at 5 cm depth on the COS ecosystem flux at times of high incoming photosynthetic active radiation ( $\text{PAR}_{\text{inc}} \geq 800$ ). Black circles depict the COS ecosystem fluxes ( $\text{pmol m}^{-2} \text{s}^{-1}$ ) if they are above the limit of detection and black x's if they are below. Filled red circles depict the mean COS ecosystem fluxes for  $\text{SWC}_{5\text{cm}}$  of 5 % bins. The red error bars depict the  $\pm 1$  standard deviation of the mean.

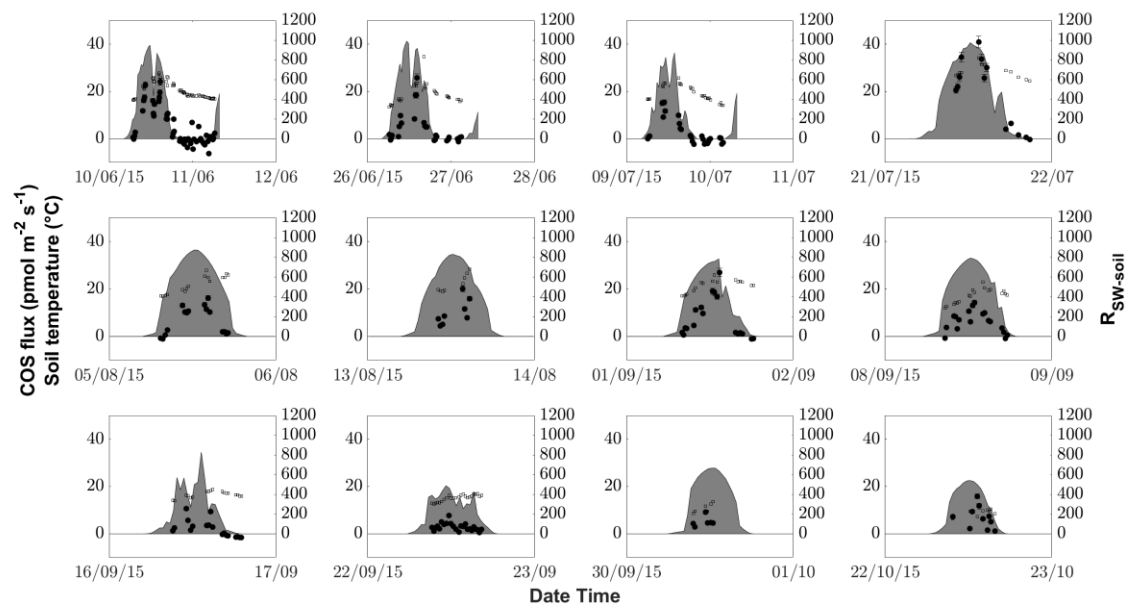

**Figure S3** COS and CO<sub>2</sub> soil fluxes ( $\text{pmol m}^{-2}\text{s}^{-1}$  and  $\mu\text{mol m}^{-2}\text{s}^{-1}$ ) originating from manual chamber measurements depicted by black circles and diamonds, respectively, incident shortwave radiation reaching the soil surface ( $R_{\text{SW-soil}}$ ) depicted by the gray area and soil temperature ( $T_{\text{soil}}$ ) depicted by empty black bordered squares.

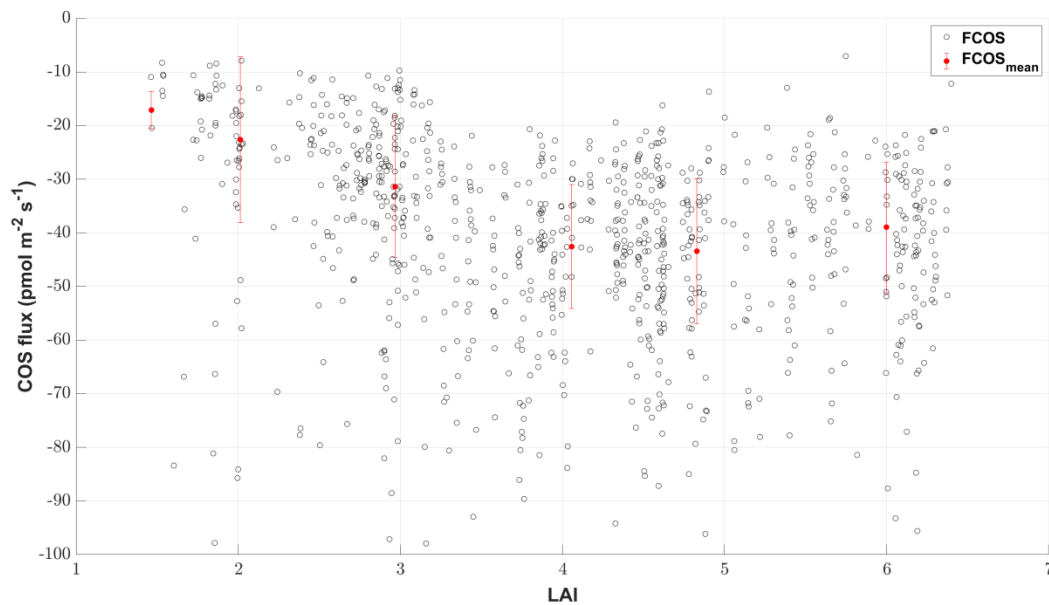

**Figure S4** Back circles depict the COS uptake ( $\text{pmol m}^{-2}\text{s}^{-1}$ ) plotted against the leaf area index (LAI) at times of high incoming photosynthetic active radiation ( $\text{PAR}_{\text{inc}} \geq 800$ ), while red filled circles depict the mean COS uptake per LAI class.

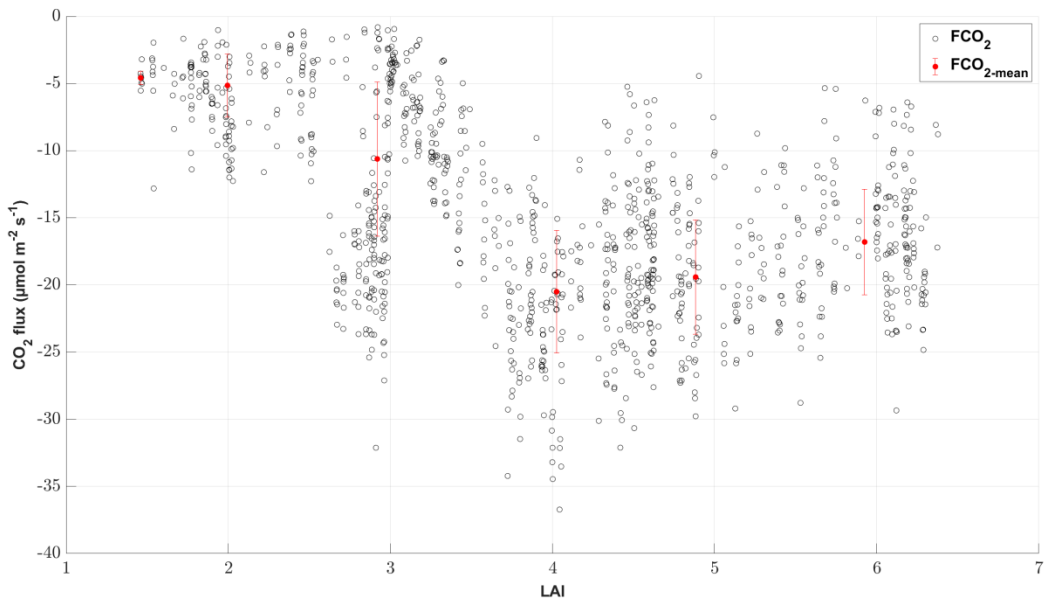

**Figure S5** Black circles depict the NEE ( $\mu\text{mol m}^{-2} \text{s}^{-1}$ ) plotted against the leaf area index (LAI) at times of high incoming photosynthetic active radiation ( $\text{PAR}_{\text{inc}} \geq 800$ ) and filtered to exclude net emissions, while red filled circles depict the mean NEE per LAI class.

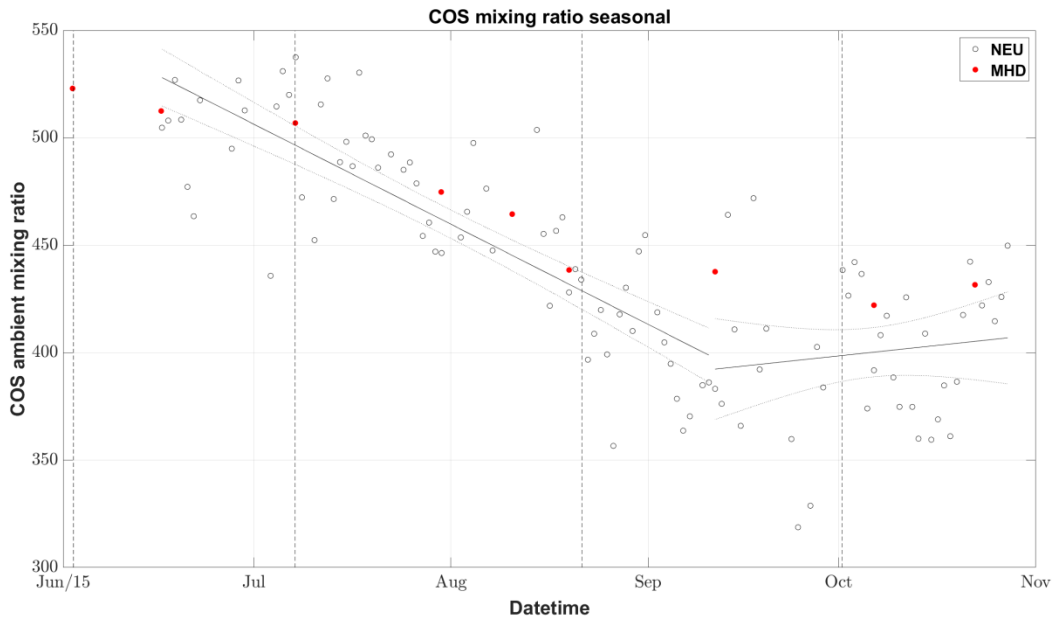

**Figure S6** Seasonal COS mixing ratio of Neustift (Austria) and Mace Head (Ireland), depicted by black and filled red circles respectively (change point detection Barr et al. (2013)).

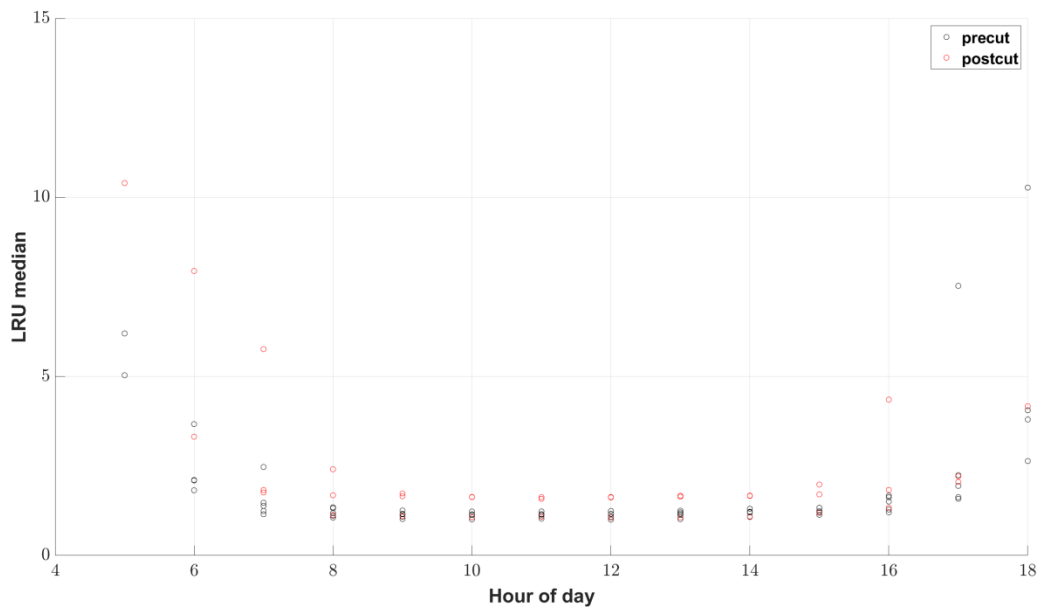

**Figure S7** Mean diurnal variation of LRU calculated from  $\iota$  and  $\kappa$  separated into the pre- and post- cut periods (~15 days each) depicted by black and red circles respectively.

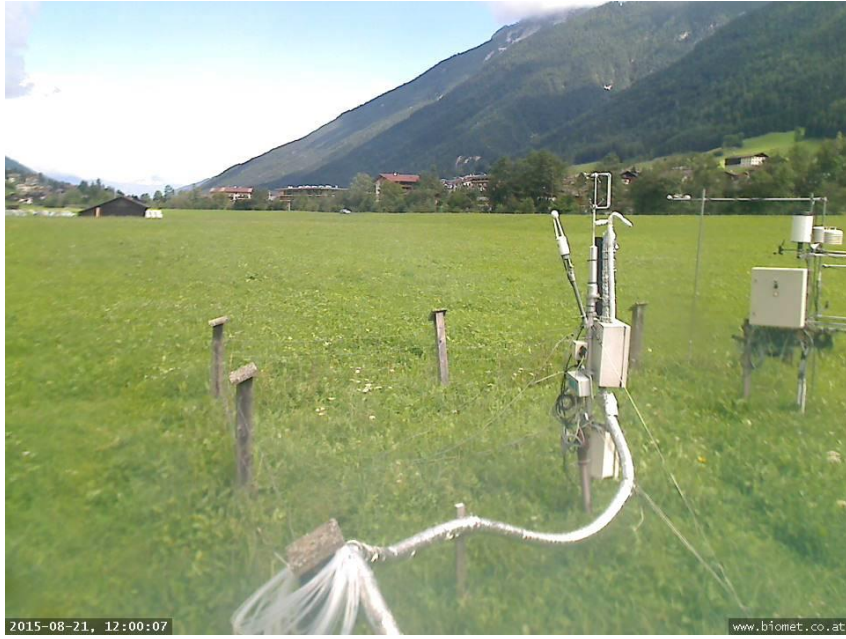

**Photo S1** Grassland before the cut (21.08.2015 12:00)

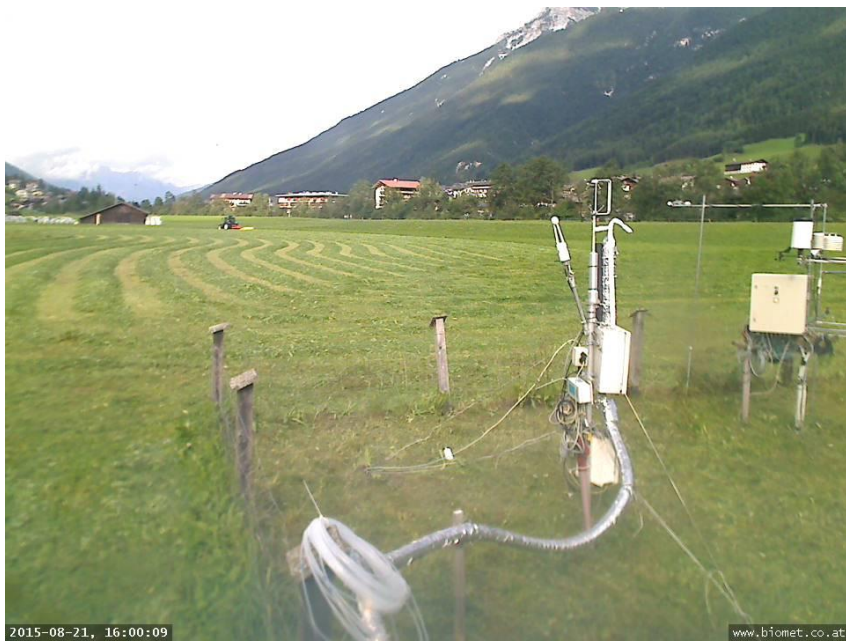

**Photo S2** Grassland during the cut when the grass was left to dry (21.08.2015 16:00)

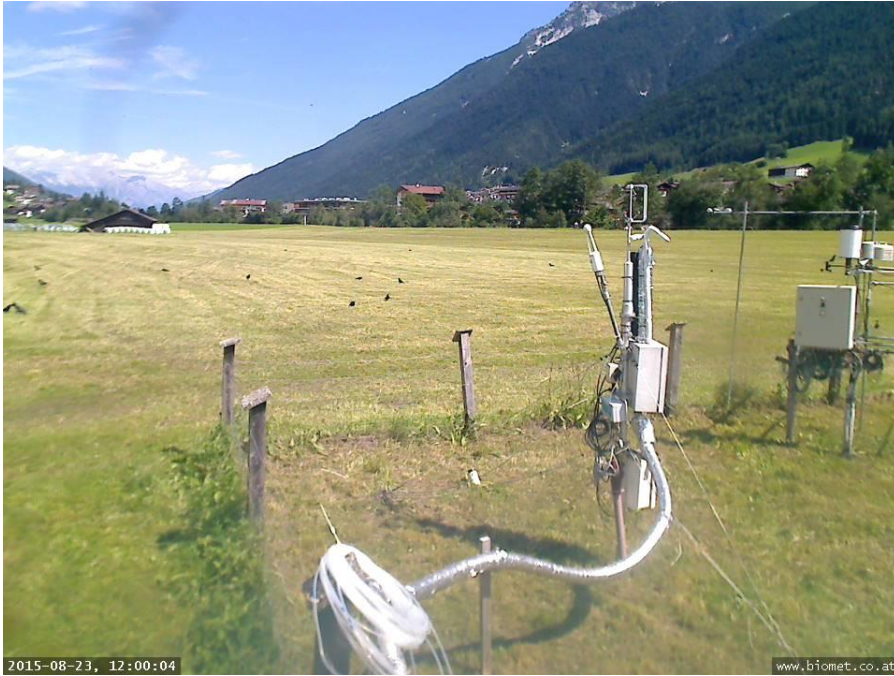

**Photo S3** Dead plant parts covering the majority of the grassland (23.08.2015 12:00)
